# Supplementary material
Source: PubMed Central journal article supplement (PMC6926153)
Supplement: NIHMS1535731-supplement-1.pdf [file NIHMS1535731-supplement-1.pdf]

Table 1. Eye Characteristics at Enrollment by Treatment Group

| Characteristic                          | Active Eyes |                |        | Placebo Eyes |                |        |
|-----------------------------------------|-------------|----------------|--------|--------------|----------------|--------|
|                                         | N           | Mean           | (SD)   | N            | Mean           | (SD)   |
| Tear osmolarity, mOsms/L                | 494         | 303.9          | (17.2) | 260          | 300.6          | (14.5) |
| Keratograph tear break-up time, secs    | 351         | 8.4            | ( 5.7) | 190          | 7.6            | ( 5.5) |
| Tear meniscus height, mm                | 351         | 0.38           | (0.17) | 190          | 0.38           | (0.14) |
| Bulbar conjunctival redness score       | 351         | 1.20           | (0.49) | 190          | 1.12           | (0.49) |
|                                         |             | <u>(N=351)</u> |        |              | <u>(N=190)</u> |        |
| Upper lid meibography-gland loss, n (%) |             |                |        |              |                |        |
| Missing value                           | 46          | (13%)          |        | 23           | (12%)          |        |
| None                                    | 73          | (21%)          |        | 35           | (18%)          |        |
| ≤25%                                    | 99          | (28%)          |        | 61           | (32%)          |        |
| >25-50%                                 | 76          | (22%)          |        | 38           | (20%)          |        |
| >50-75%                                 | 39          | (11%)          |        | 26           | (14%)          |        |
| >75%                                    | 18          | ( 5%)          |        | 7            | ( 4%)          |        |
| Lower lid meibography-gland loss, n (%) |             |                |        |              |                |        |
| Missing value                           | 12          | ( 3%)          |        | 7            | ( 4%)          |        |
| None                                    | 55          | (16%)          |        | 37           | (19%)          |        |
| ≤25%                                    | 124         | (35%)          |        | 70           | (37%)          |        |
| >25-50%                                 | 78          | (22%)          |        | 41           | (22%)          |        |
| >50-75%                                 | 60          | (17%)          |        | 19           | (10%)          |        |
| >75%                                    | 22          | ( 6%)          |        | 16           | ( 8%)          |        |
|                                         |             | <u>(N=665)</u> |        |              | <u>(N=357)</u> |        |
| MMP-9 result, n (%)                     |             |                |        |              |                |        |
| Negative                                | 439         | (67%)          |        | 247          | (70%)          |        |
| Positive                                | 218         | (33%)          |        | 108          | (30%)          |        |

SD is standard deviation
