# Supplementary material
Source: PubMed Central journal article supplement (PMC6926153)
Supplement: NIHMS1535731-supplement-2.pdf [file NIHMS1535731-supplement-2.pdf]

Table 2. Changes in Eye Characteristics from Baseline by Treatment Group

| Characteristic                            | Change* from Baseline |                 |        |              |                |        | Between Group Difference |               |      |
|-------------------------------------------|-----------------------|-----------------|--------|--------------|----------------|--------|--------------------------|---------------|------|
|                                           | Active Eyes           |                 |        | Placebo Eyes |                |        | Mean                     | (95% CI)      | P    |
|                                           | N                     | Mean            | (SD)   | N            | Mean           | (SD)   |                          |               |      |
| Tear osmolarity, mOsm/L                   | 424                   | -0.7            | (21.5) | 212          | 3.6            | (18.3) | +4.3                     | (0.7, 7.8)    | 0.02 |
| Keratograph tear break-up time, secs      | 290                   | -0.5            | ( 6.7) | 149          | -0.5           | ( 6.1) | 0.0                      | (-1.3, 1.3)   | 0.97 |
| Tear meniscus height, mm                  | 317                   | 0.00            | (0.16) | 162          | -0.01          | (0.14) | -0.01                    | (-0.04, 0.03) | 0.71 |
| Bulbar conjunctival redness score         | 273                   | -0.00           | (0.34) | 145          | -0.01          | (0.40) | -0.02                    | (-0.10,0.06)  | 0.66 |
|                                           |                       | <u>(N=324)</u>  |        |              | <u>(N=164)</u> |        |                          |               |      |
| Upper lid meibography - gland loss, n (%) |                       |                 |        |              |                |        | <b>P</b>                 |               |      |
| Improved                                  |                       | 81              | (25%)  |              | 35             | (21%)  | 0.34                     |               |      |
| Same                                      |                       | 92              | (28%)  |              | 59             | (36%)  |                          |               |      |
| Worse                                     |                       | 71              | (22%)  |              | 34             | (21%)  |                          |               |      |
| Missing                                   |                       | 80              | (25%)  |              | 36             | (22%)  |                          |               |      |
| Lower lid meibography - gland loss, n (%) |                       |                 |        |              |                |        | <b>P</b>                 |               |      |
| Improved                                  |                       | 102             | (31%)  |              | 38             | (23%)  | 0.21                     |               |      |
| Same                                      |                       | 116             | (36%)  |              | 64             | (39%)  |                          |               |      |
| Worse                                     |                       | 82              | (25%)  |              | 51             | (31%)  |                          |               |      |
| Missing                                   |                       | 24              | (7%)   |              | 11             | (7%)   |                          |               |      |
|                                           |                       | <u>(N= 611)</u> |        |              | <u>(N=320)</u> |        |                          |               |      |
| MMP-9 result, baseline to 3 months, n (%) |                       |                 |        |              |                |        | <b>P</b>                 |               |      |
| Negative to Negative                      |                       | 351             | (57%)  |              | 178            | (56%)  | 0.69                     |               |      |
| Negative to Positive                      |                       | 61              | (10%)  |              | 43             | (13%)  |                          |               |      |
| Positive to Negative                      |                       | 82              | (13%)  |              | 40             | (13%)  |                          |               |      |
| Positive to Positive                      |                       | 117             | (19%)  |              | 59             | (18%)  |                          |               |      |

\*Changes are between baseline and 12 months except for MMP-9 results

SD is standard deviation

CI is confidence interval

p-values for upper/lower lid meibography and MMP-9 positivity are calculated without the missing category.
