# Supplementary material
Source: PubMed Central journal article supplement (PMC6926153)
Supplement: NIHMS1535731-supplement-3.pdf [file NIHMS1535731-supplement-3.pdf]

Table 3: Changes in Eye Characteristics from Baseline by Treatment Group, Stratified by Baseline Level of the Characteristic

| Baseline subgroup                 | Active Eyes |       |        | Placebo Eyes |       |        | Between Group Difference |               | p    |
|-----------------------------------|-------------|-------|--------|--------------|-------|--------|--------------------------|---------------|------|
|                                   | N           | Mean  | (SD)   | N            | Mean  | (SD)   | Mean                     | (95% CI)      |      |
| Tear osmolarity, mOsm/L           |             |       |        |              |       |        |                          |               |      |
| <308 (N=457)                      | 288         | 5.6   | (17.2) | 169          | 7.3   | (15.9) | -1.7                     | (-5.1, 1.8)   | 0.34 |
| ≥308 (N=179)                      | 136         | -14.1 | (23.5) | 43           | -11.2 | (19.9) | -2.9                     | (-10.1, 4.3)  | 0.44 |
| Interaction                       |             |       |        |              |       |        |                          |               | 0.76 |
| Tear break-up time, secs          |             |       |        |              |       |        |                          |               |      |
| <4.6 (N=137)                      | 86          | 2.6   | (4.8)  | 51           | 2.5   | (3.9)  | 0.0                      | (-1.6, 1.7)   | 0.97 |
| ≥4.6, <9.2 (N=148)                | 97          | 1.1   | (5.1)  | 51           | 0.6   | (4.7)  | 0.5                      | (-1.2, 2.2)   | 0.56 |
| ≥9.2 (N=154)                      | 107         | -4.4  | (7.4)  | 47           | -5.0  | (6.8)  | 0.7                      | (-1.6, 2.9)   | 0.57 |
| Interaction                       |             |       |        |              |       |        |                          |               | 0.88 |
| Tear meniscus height, mm          |             |       |        |              |       |        |                          |               |      |
| <0.30 (N=149)                     | 113         | 0.04  | (0.13) | 36           | 0.05  | (0.14) | -0.01                    | (-0.08, 0.05) | 0.68 |
| ≥0.30, <0.41 (N=162)              | 95          | 0.01  | (0.11) | 67           | 0.01  | (0.12) | 0.00                     | (-0.04, 0.04) | 0.87 |
| ≥0.41 (N=168)                     | 109         | -0.05 | (0.20) | 59           | -0.06 | (0.15) | 0.01                     | (-0.05, 0.07) | 0.77 |
| Interaction                       |             |       |        |              |       |        |                          |               | 0.87 |
| Bulbar conjunctival redness score |             |       |        |              |       |        |                          |               |      |
| <1.00 (N=154)                     | 96          | 0.08  | (0.20) | 58           | 0.07  | (0.26) | 0.01                     | (-0.07, 0.10) | 0.81 |
| ≥1.00, <1.40 (N=124)              | 81          | 0.07  | (0.32) | 43           | -0.03 | (0.31) | 0.09                     | (-0.02, 0.21) | 0.11 |
| ≥1.40 (N=140)                     | 96          | -0.13 | (0.55) | 44           | -0.11 | (0.44) | -0.01                    | (-0.20, 0.17) | 0.90 |
| Interaction                       |             |       |        |              |       |        |                          |               | 0.39 |

SD is standard deviation  
CI is confidence interval
